# Supplementary material
Source: PubMed Central journal article supplement (PMC2945909)

**Supporting Information-2**  
**Enantioselective Total Synthesis of Largazole, a Potent Inhibitor of**  
**Histone Deacetylase**

Arun K. Ghosh,\* and Sarang Kulkarni

*Departments of Chemistry and Medicinal Chemistry, Purdue University,  
West Lafayette, IN 47907*

## Contents

<sup>1</sup>H and <sup>13</sup>C NMR spectra of key synthetic compounds:

|                                                      |     |
|------------------------------------------------------|-----|
| <sup>1</sup> H NMR for <b>5</b> .....                | S12 |
| <sup>13</sup> C NMR for <b>5</b> .....               | S13 |
| <sup>1</sup> H NMR for <b>10</b> .....               | S14 |
| <sup>13</sup> C NMR for <b>10</b> .....              | S15 |
| <sup>1</sup> H NMR for <b>11</b> .....               | S16 |
| <sup>13</sup> C NMR for <b>11</b> .....              | S17 |
| <sup>1</sup> H NMR for <b>3</b> .....                | S18 |
| <sup>13</sup> C NMR for <b>3</b> .....               | S19 |
| <sup>1</sup> H NMR for <b>8</b> .....                | S20 |
| <sup>13</sup> C NMR for <b>8</b> .....               | S21 |
| <sup>1</sup> H NMR for <b>15</b> .....               | S22 |
| <sup>13</sup> C NMR for <b>15</b> .....              | S23 |
| <sup>1</sup> H NMR for <b>4</b> .....                | S24 |
| <sup>13</sup> C NMR for <b>4</b> .....               | S25 |
| <sup>1</sup> H NMR for <b>2</b> .....                | S26 |
| <sup>13</sup> C NMR for <b>2</b> .....               | S27 |
| <sup>1</sup> H NMR for <b>1</b> .....                | S28 |
| <sup>13</sup> C NMR for <b>1</b> .....               | S29 |
| Comparison of <sup>1</sup> H NMR for <b>1</b> .....  | S30 |
| Comparison of <sup>13</sup> C NMR for <b>1</b> ..... | S31 |

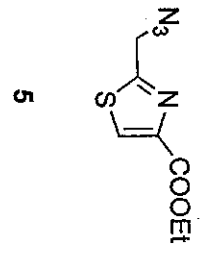

0.913

2.000

2.152

3.157

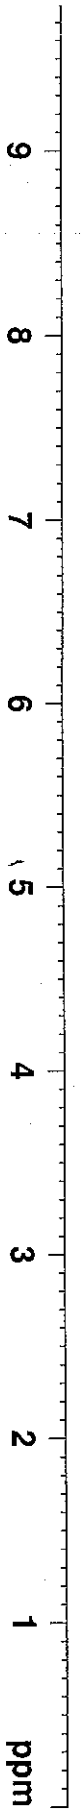

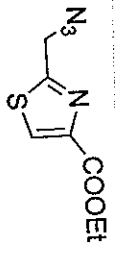

5

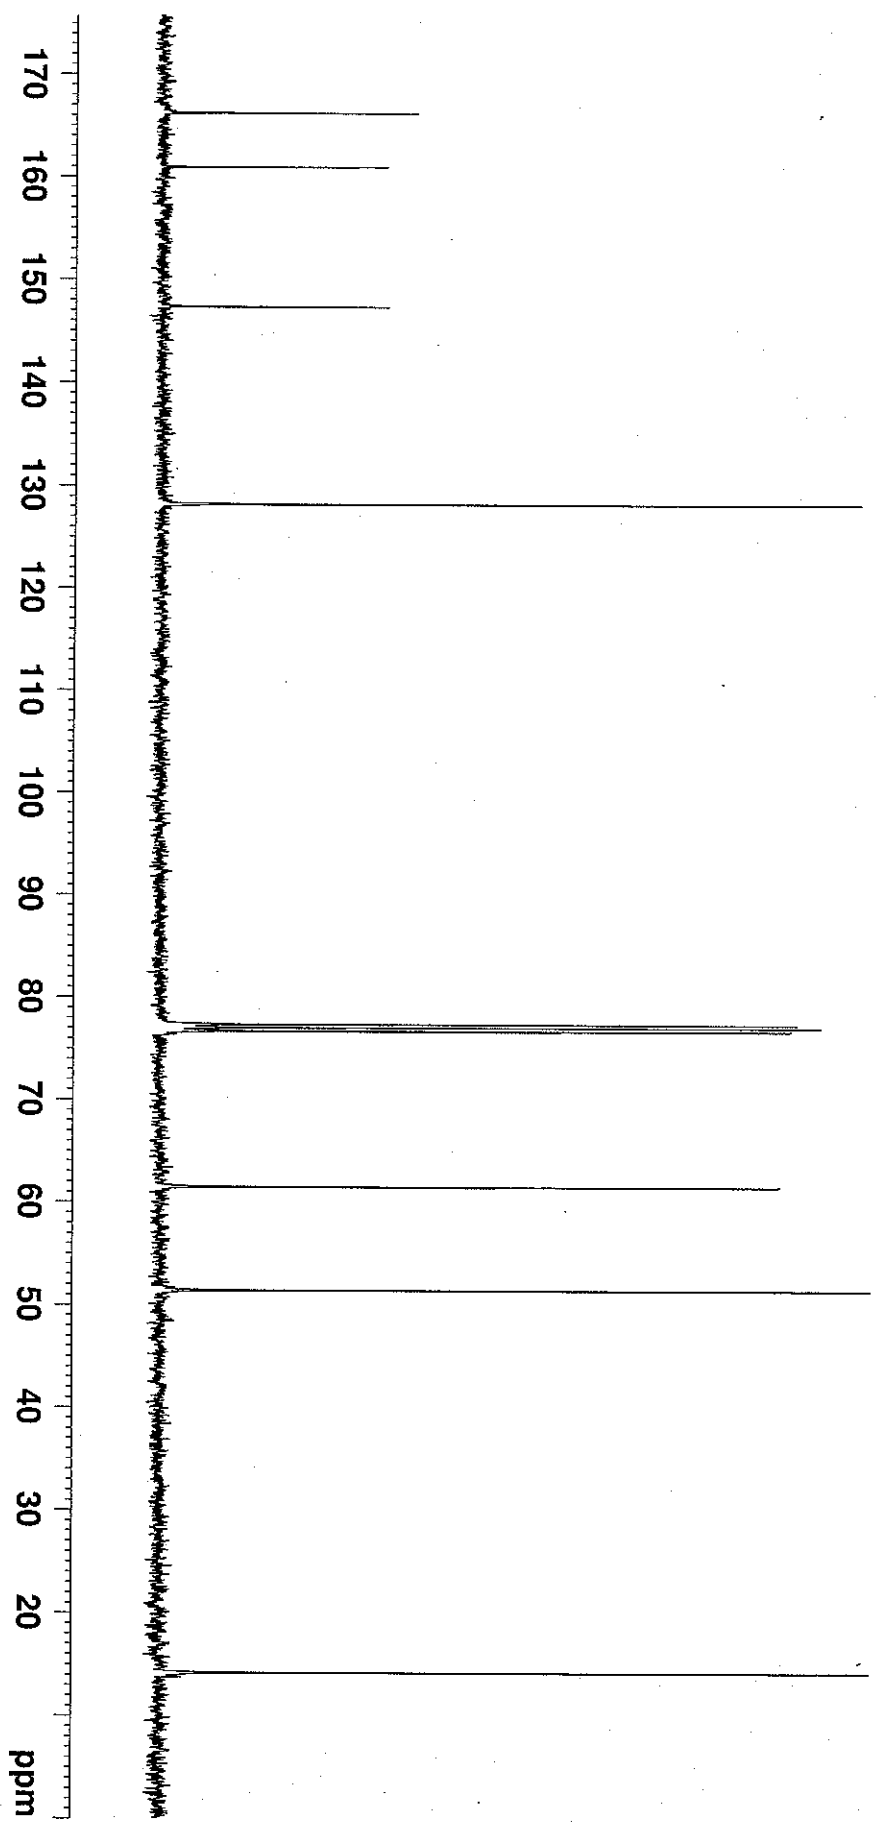

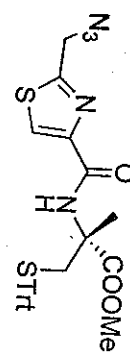

10

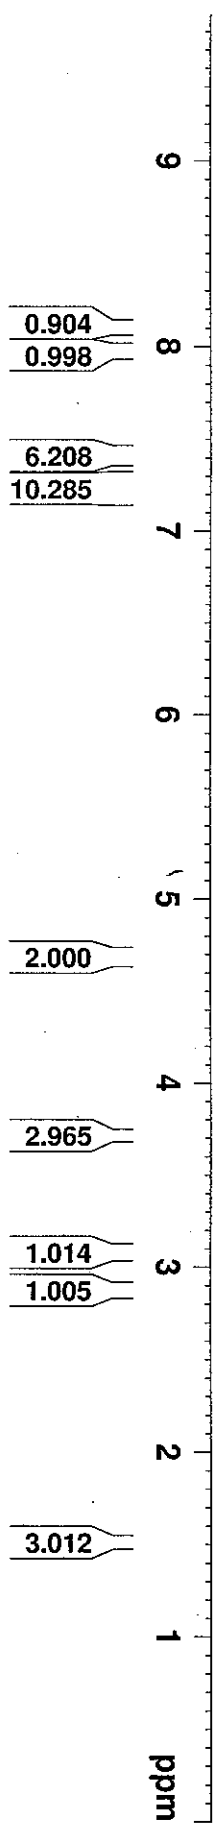

210 200 190 180 170 160 150 140 130 120 110 100 90 80 70 60 50 40 30 20 ppm

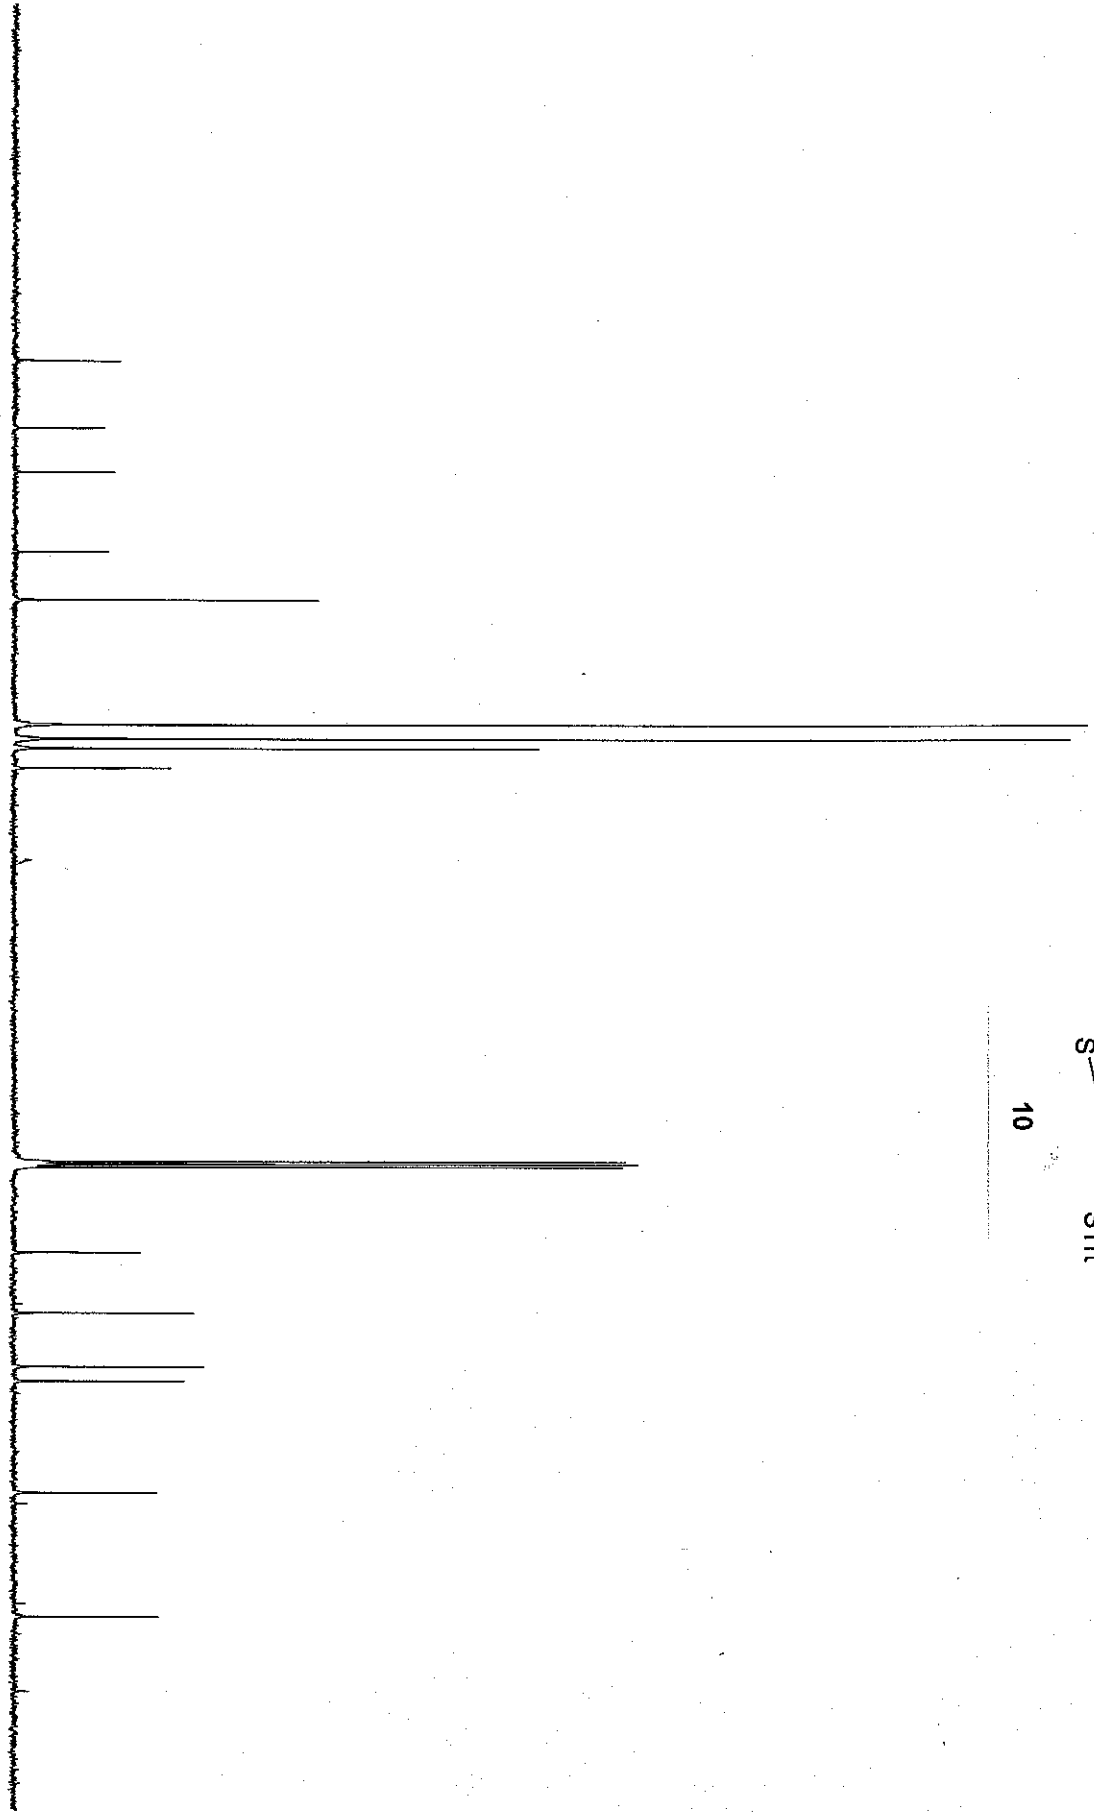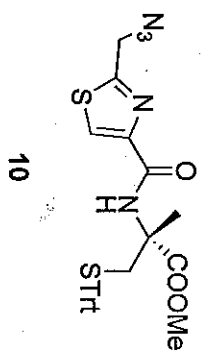

1.000

2.317

1.372  
3.474

1.206

3.549

9  
8  
7  
6  
5  
4  
3  
2  
1  
ppm

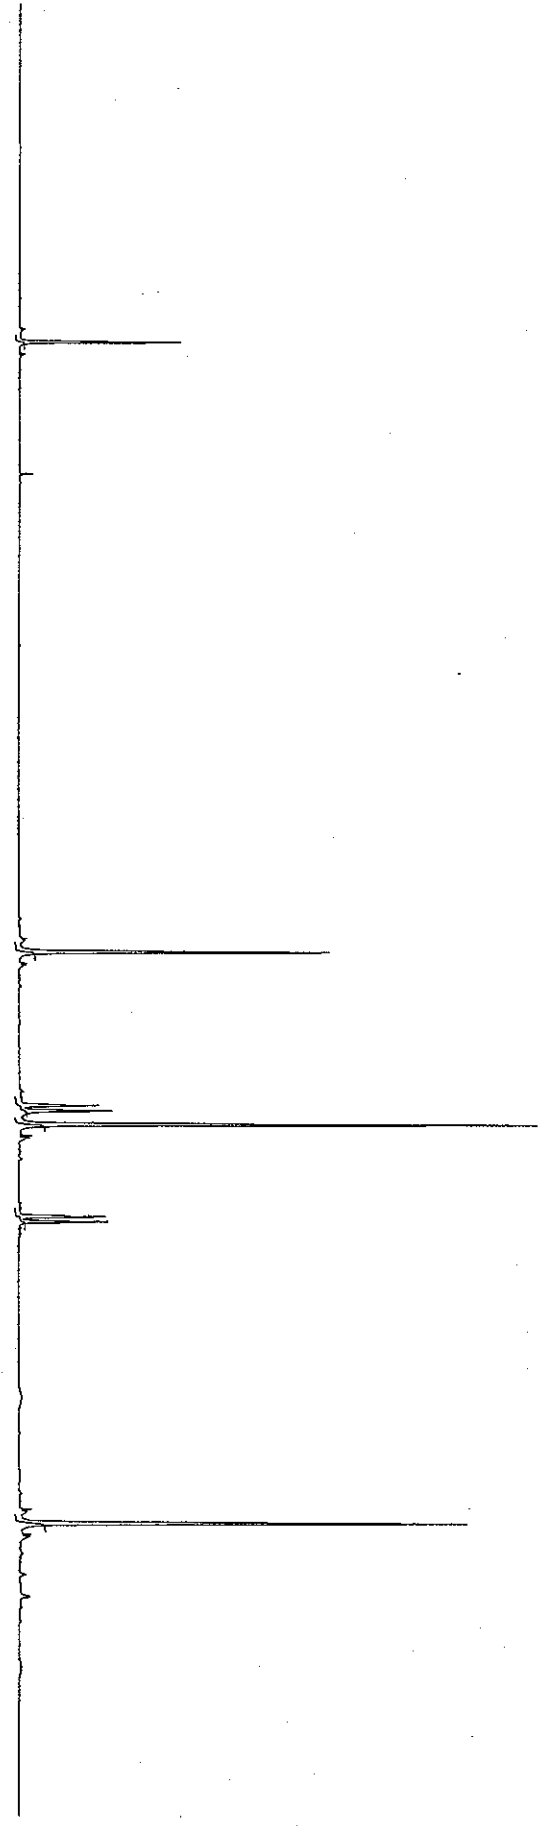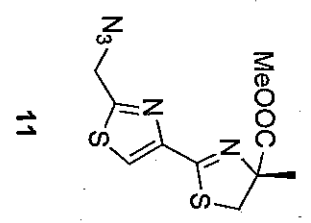

210 200 190 180 170 160 150 140 130 120 110 100 90 80 70 60 50 40 30 20 ppm

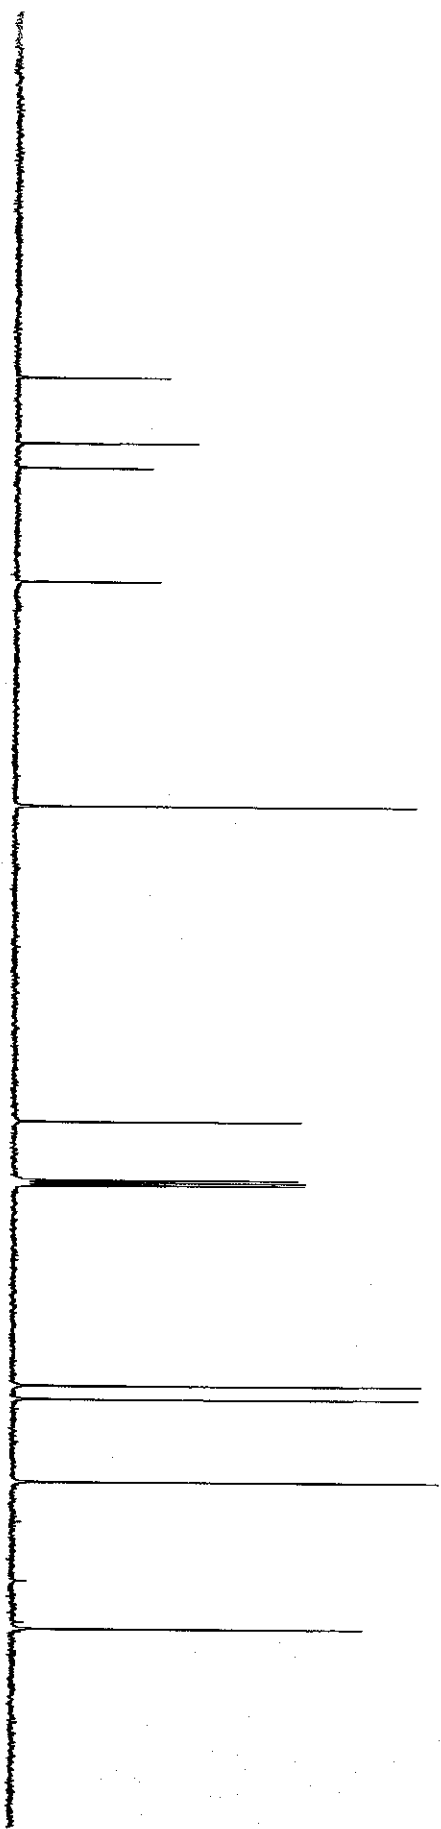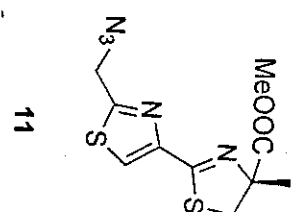

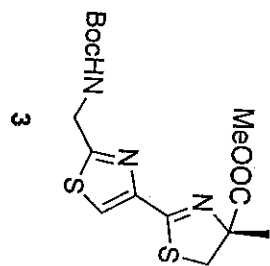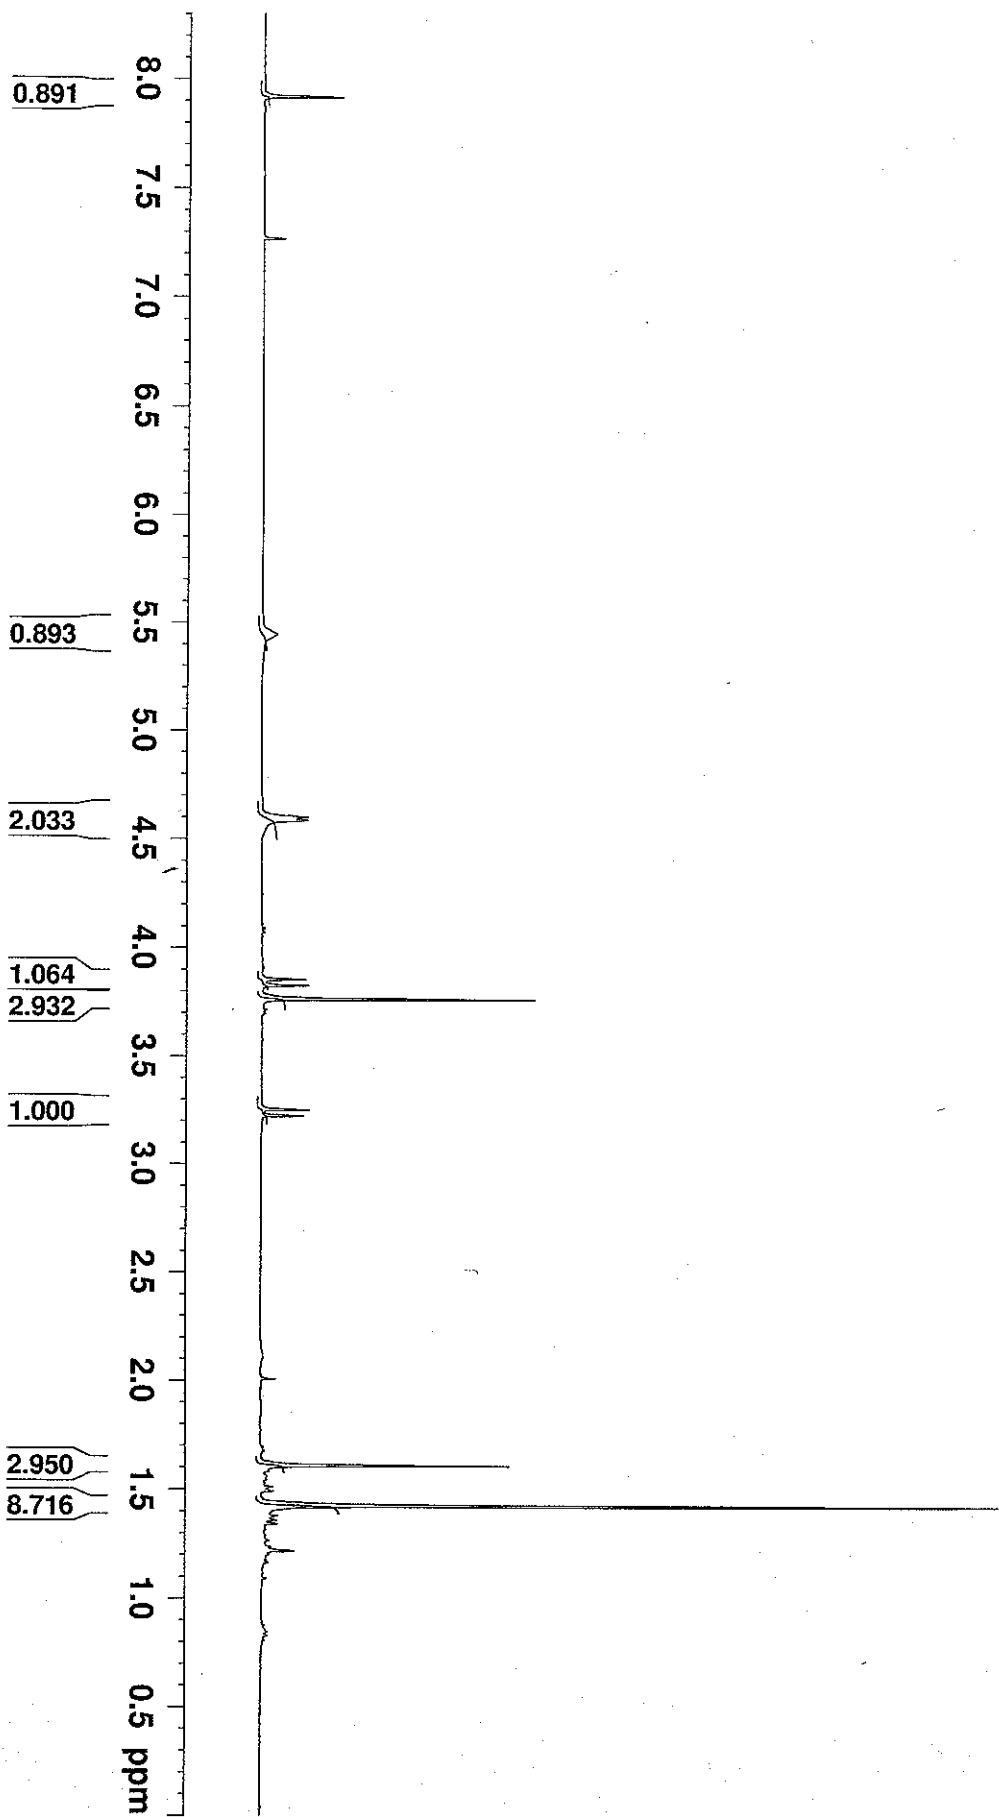



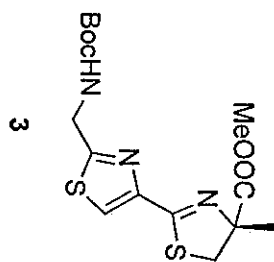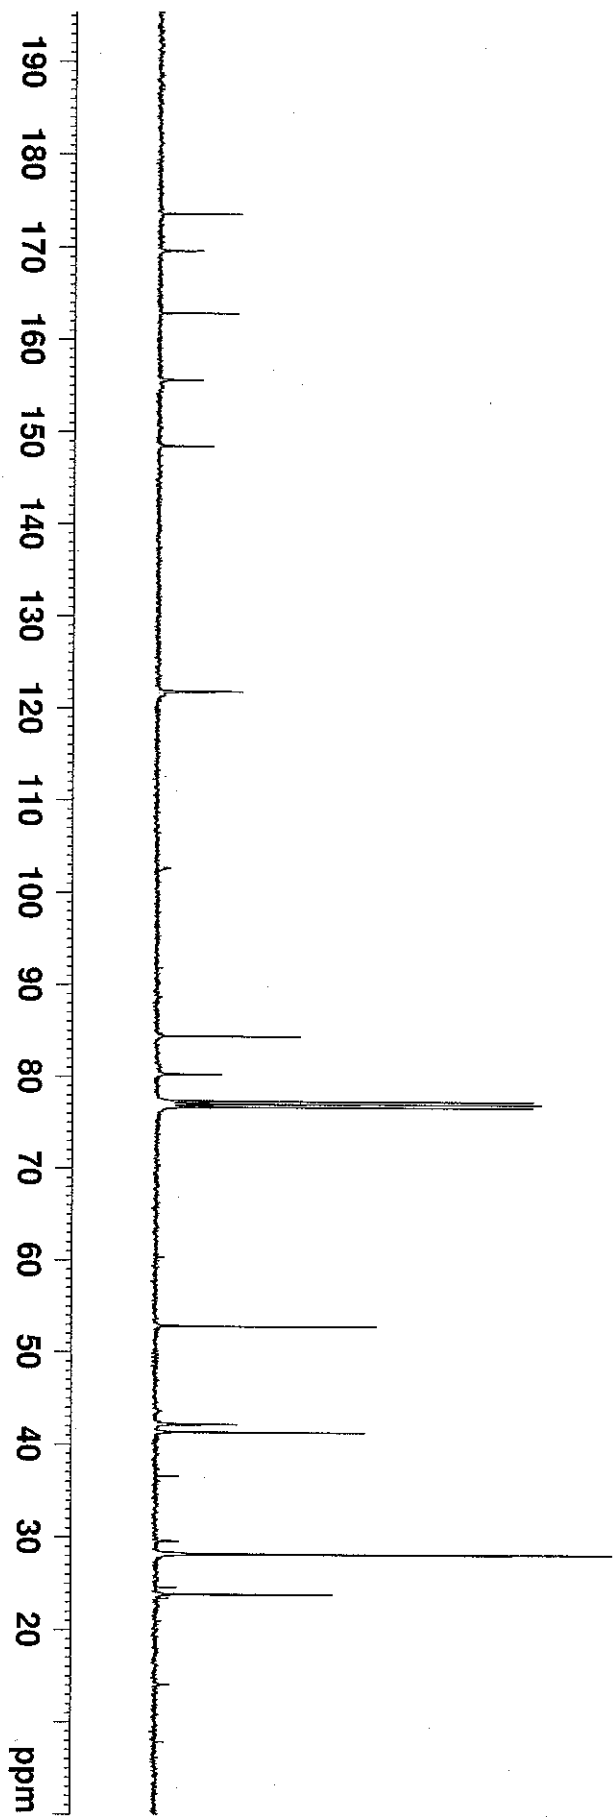

9  
8  
7  
6  
5  
4  
3  
2  
1  
ppm

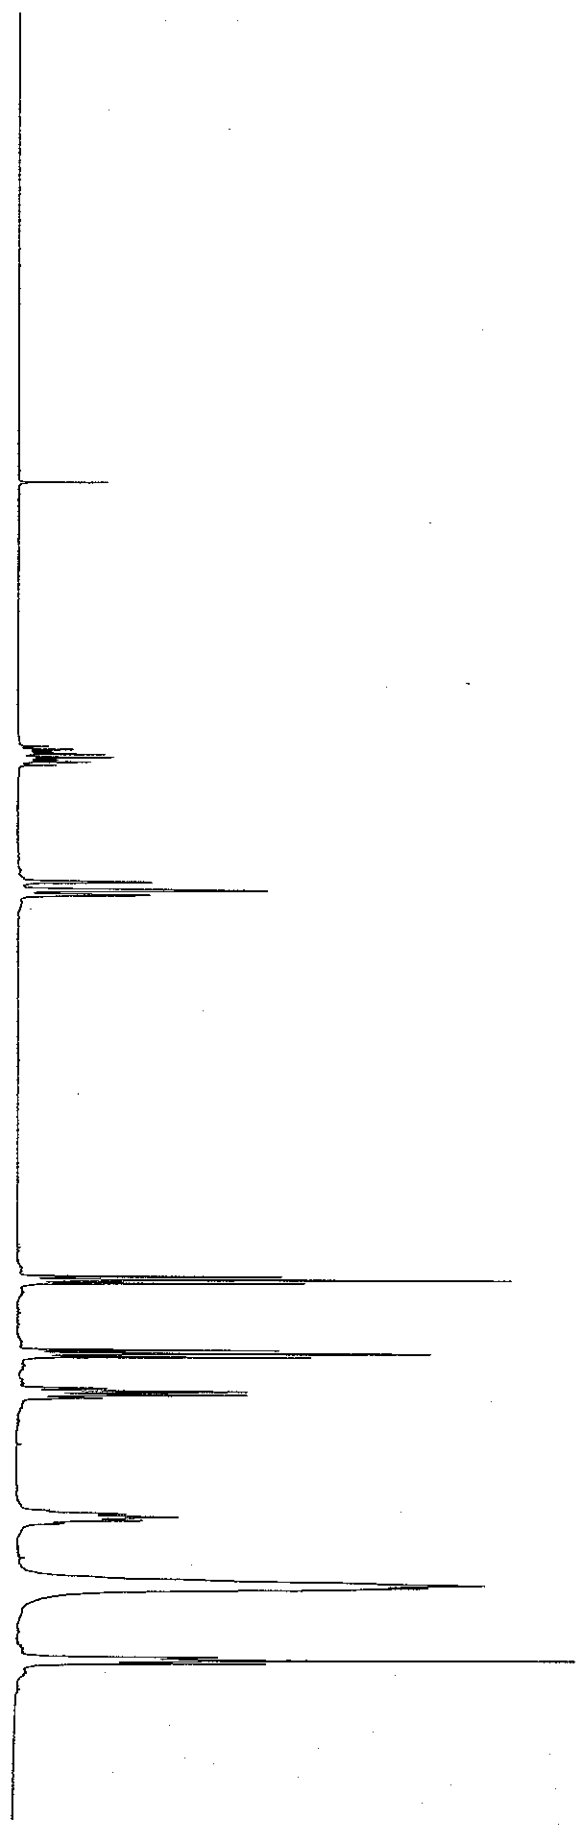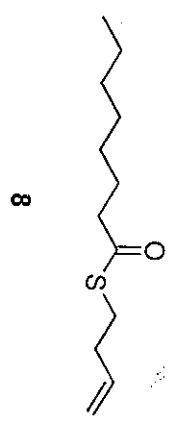

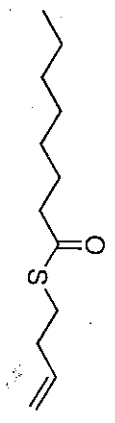

8

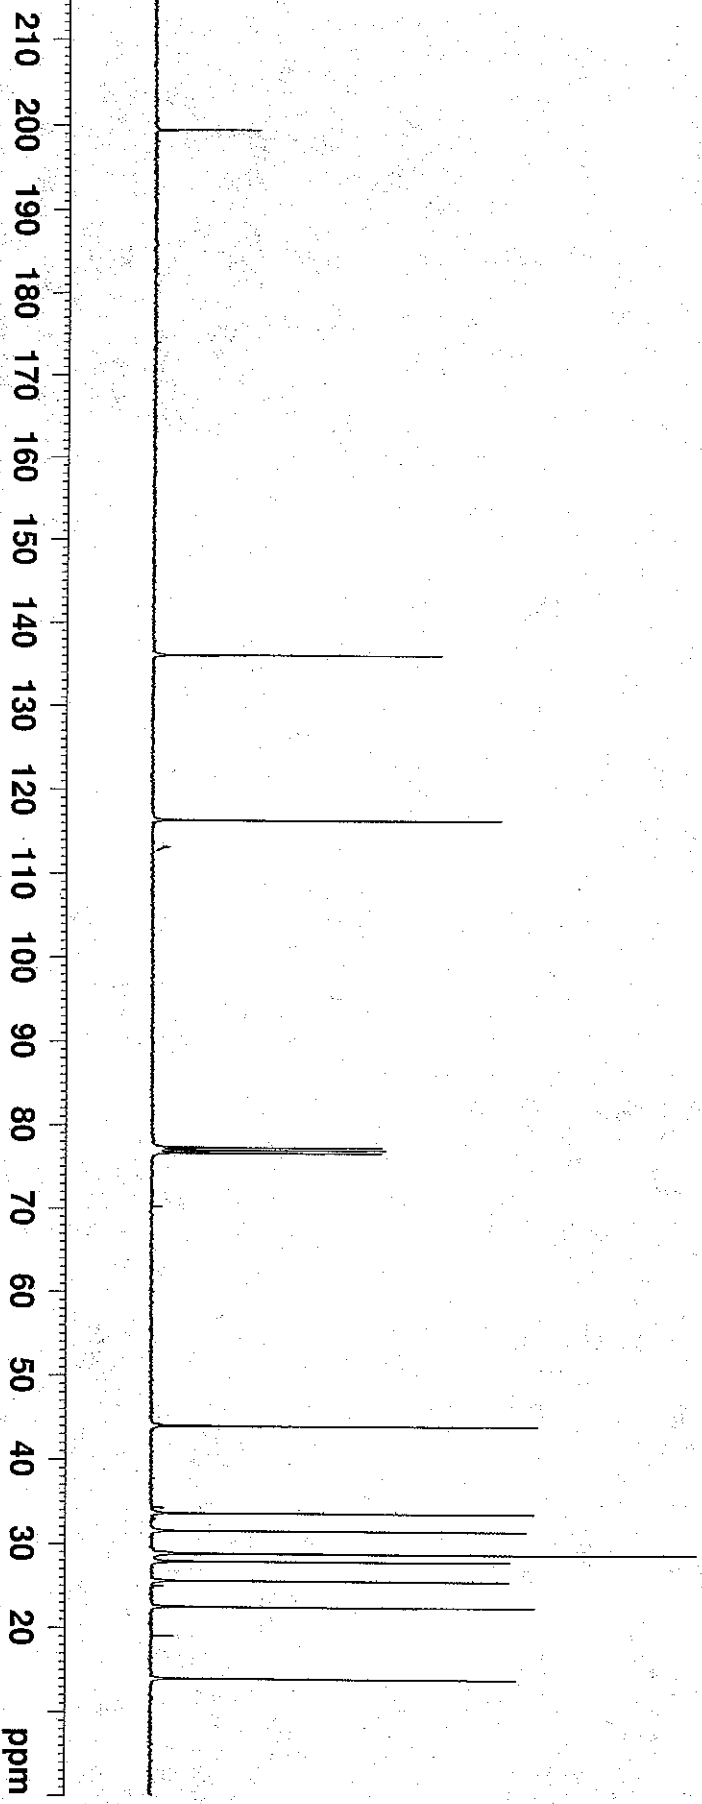

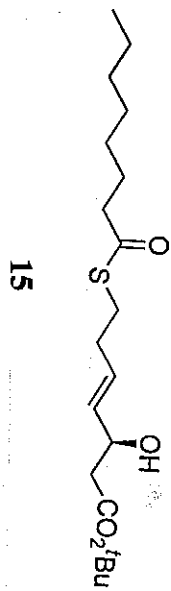

0.933  
1.088

0.906

0.846  
1.973

2.056  
1.793  
1.911

1.908  
9.187  
9.173

2.957

ppm

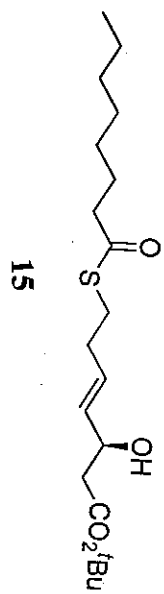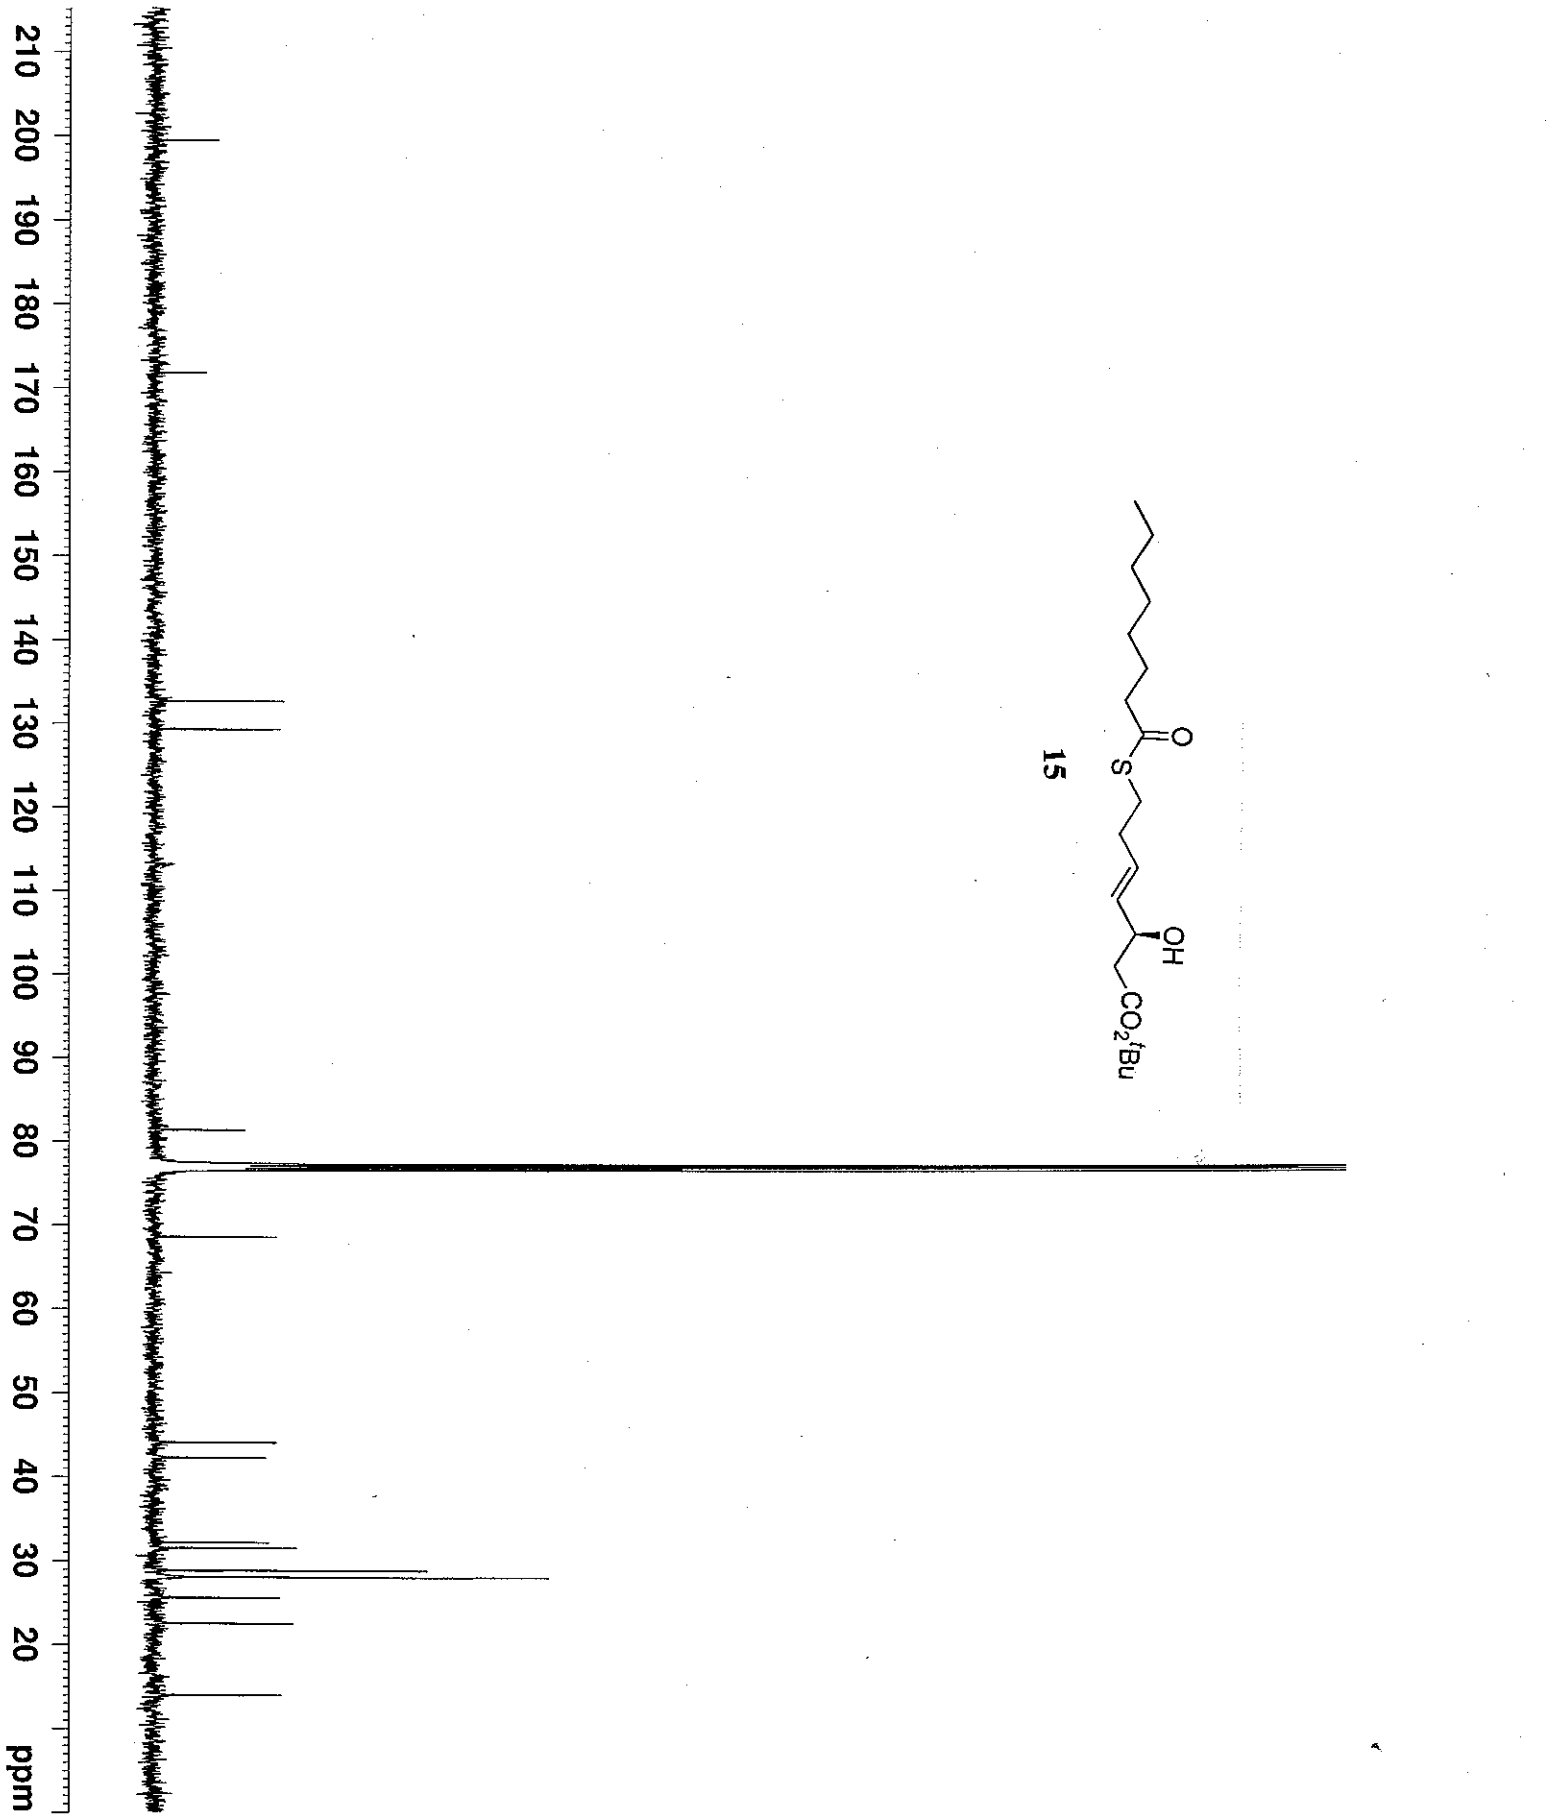

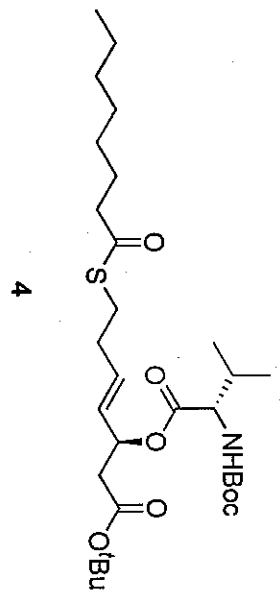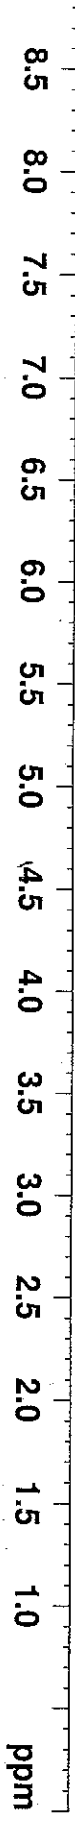

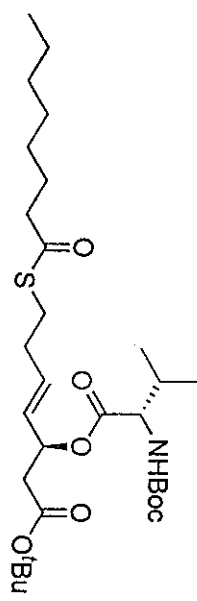

4

210 200 190 180 170 160 150 140 130 120 110 100 90 80 70 60 50 40 30 20 ppm

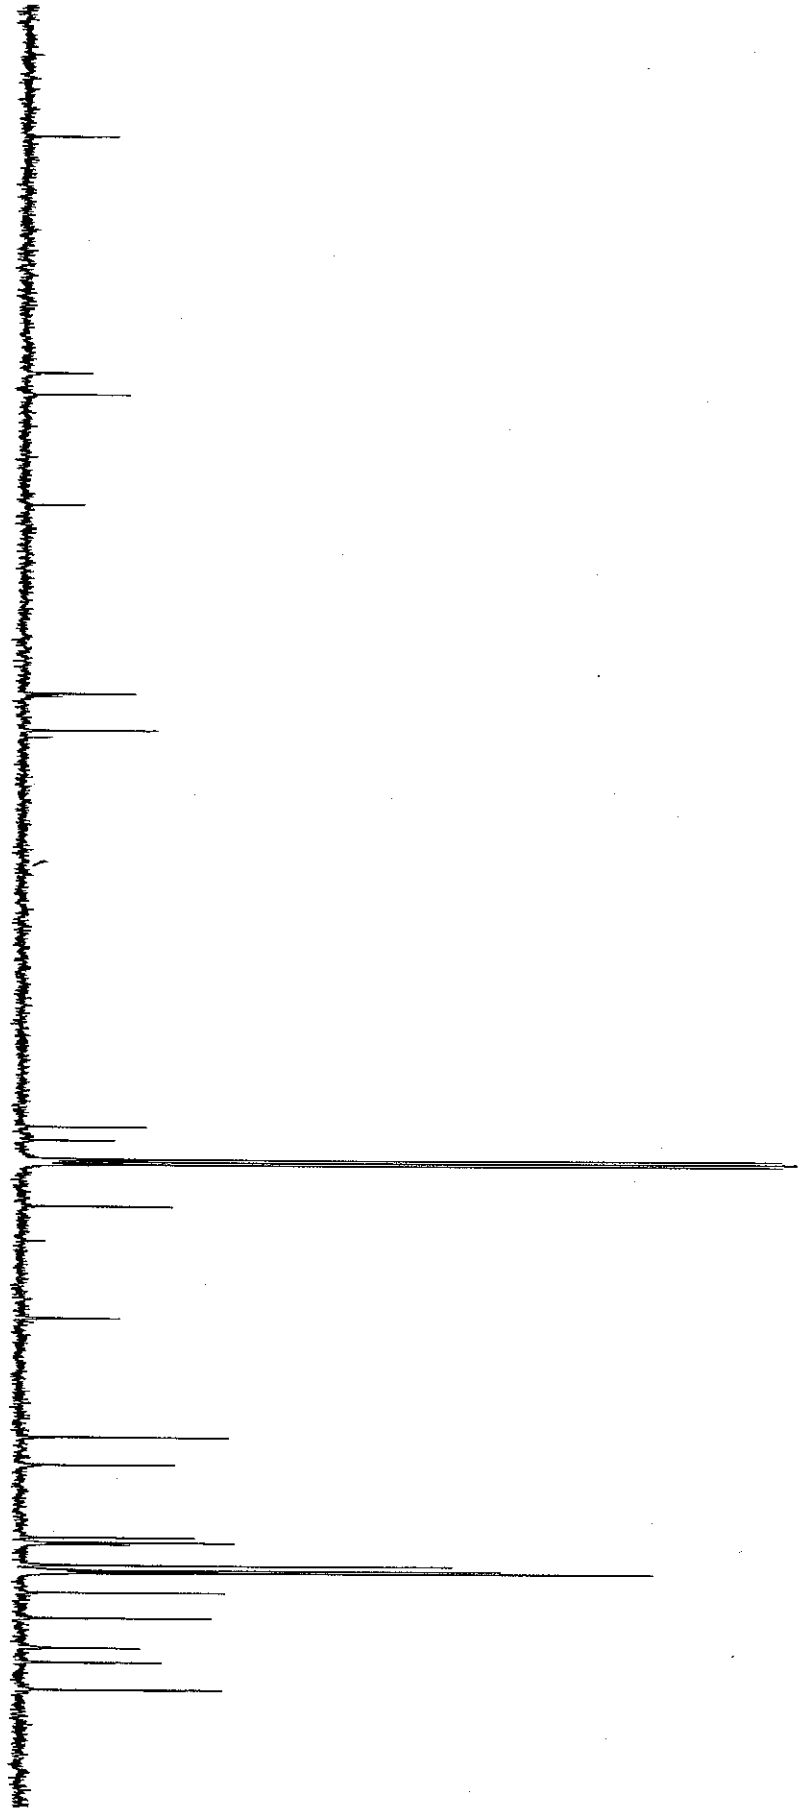

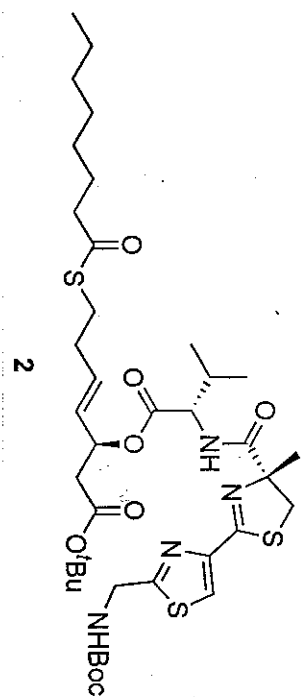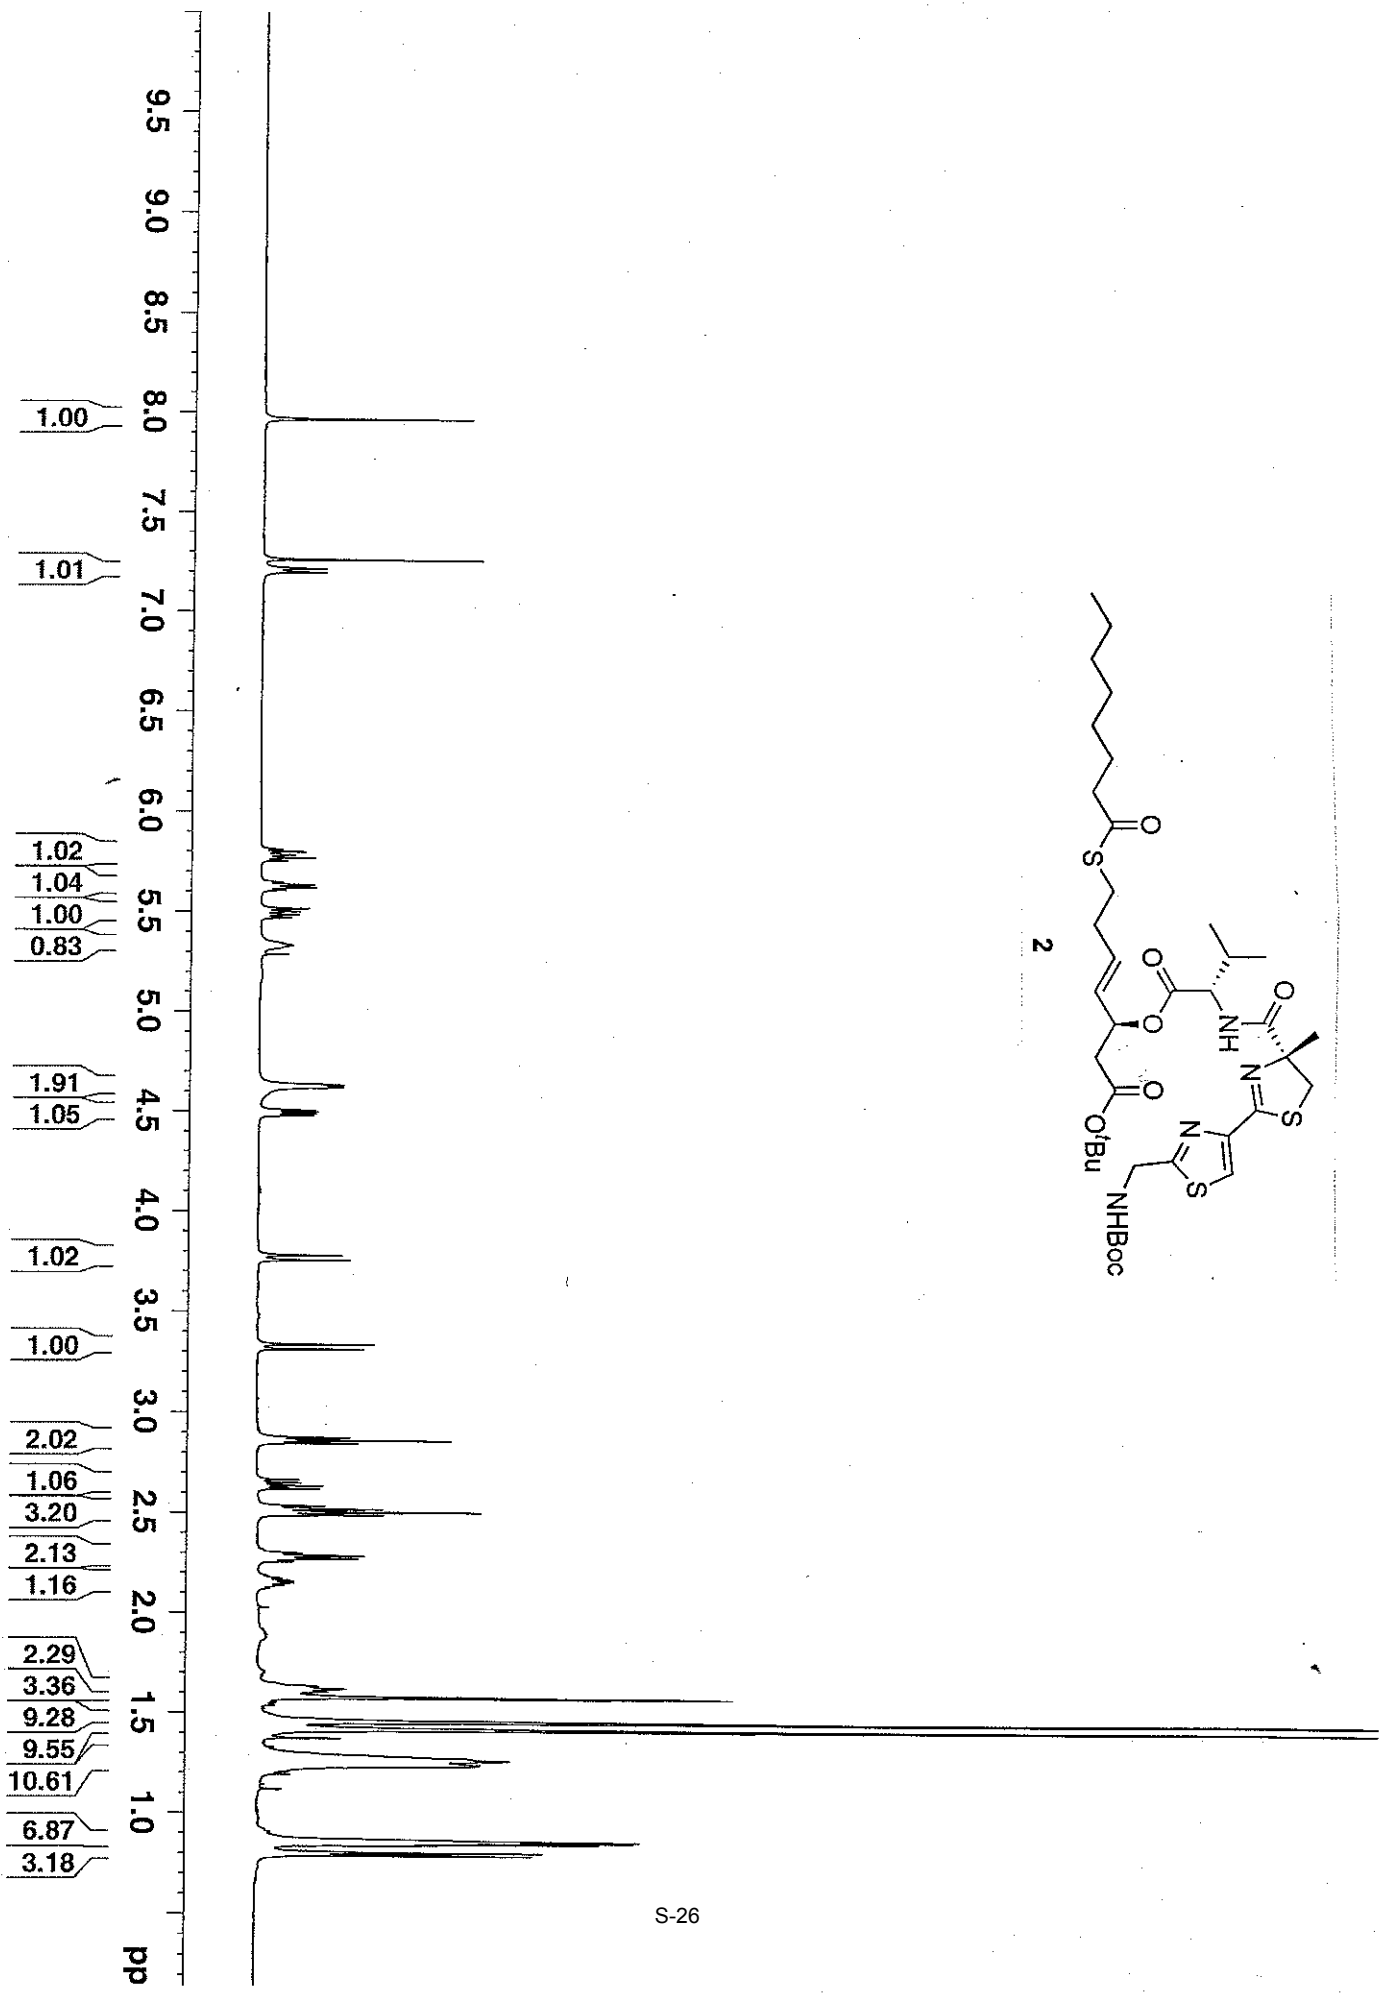



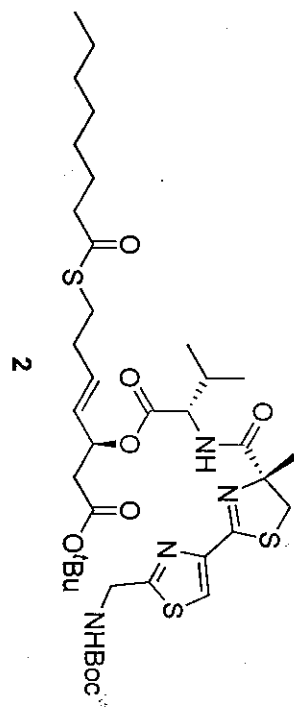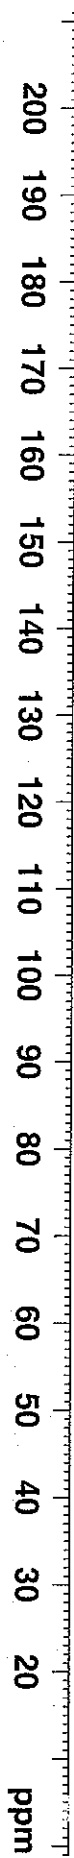

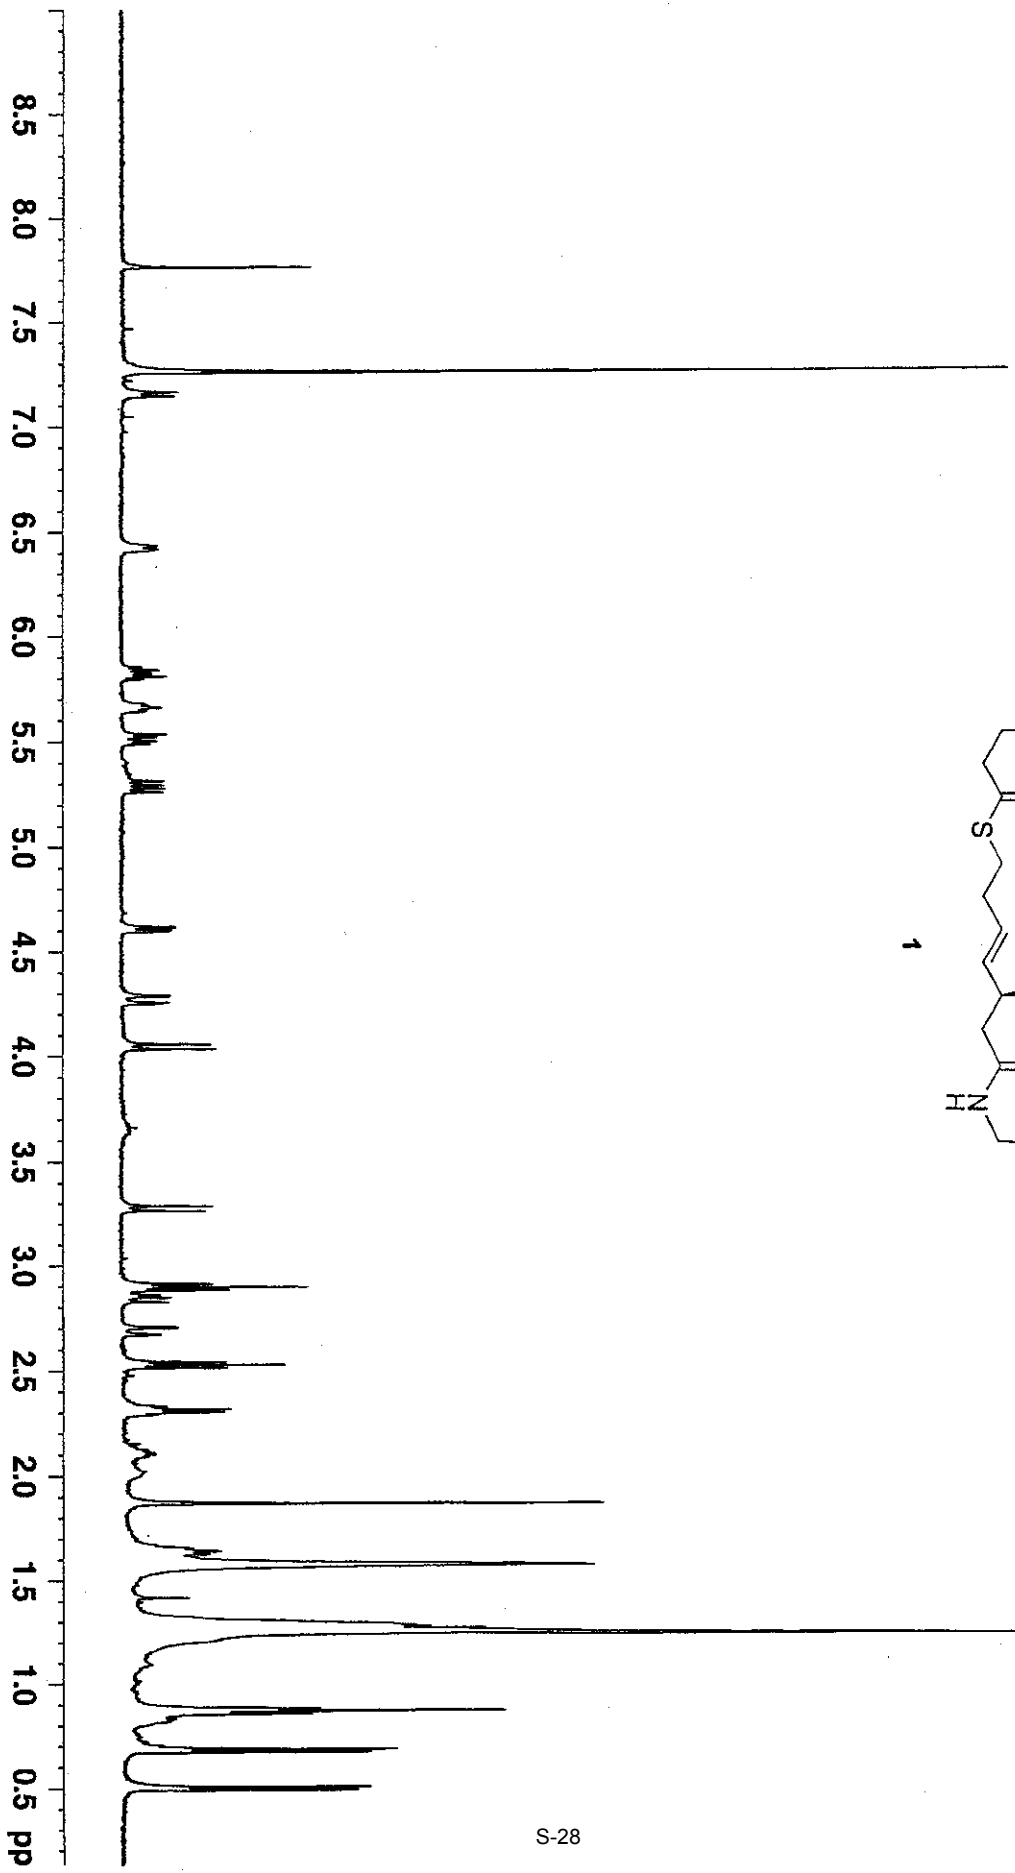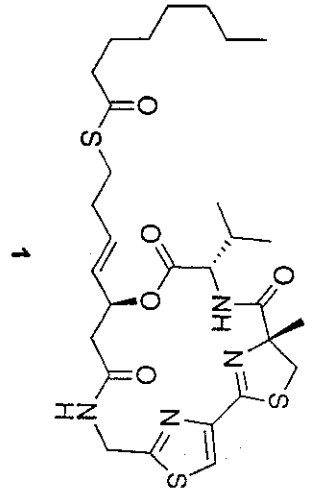

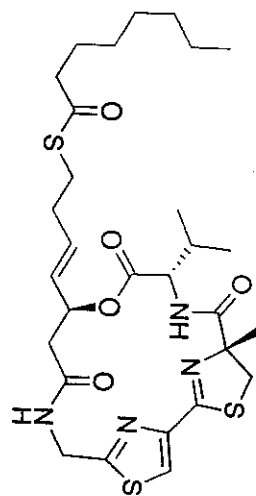

1

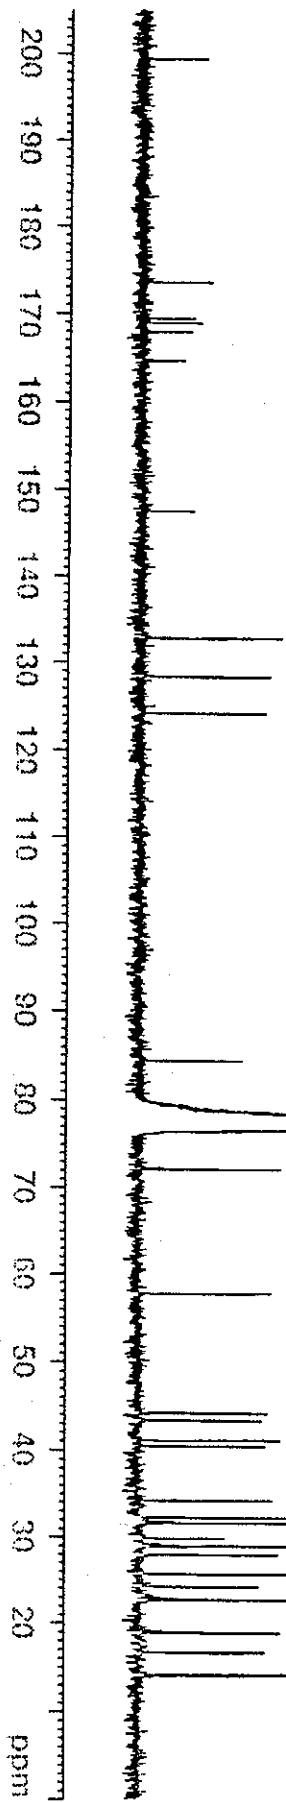

Synthetic Largazole, Ghosh, et.al

$^1\text{H}$  NMR (500 MHz,  $\text{CDCl}_3$ )

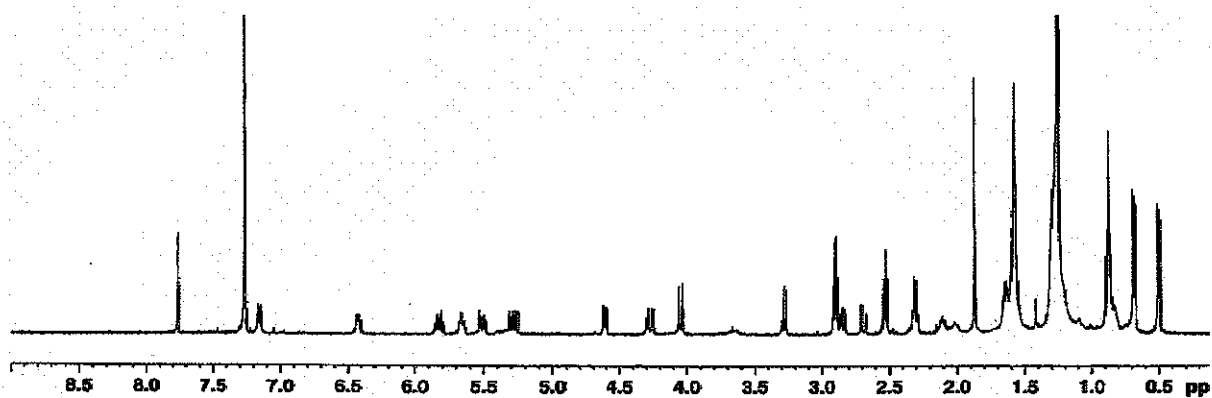

Synthetic Largazole, Leusch, Hong, et.al. (*J. Am. Chem. Soc.*, 2008, 130, 8455-8459)

$^1\text{H}$  NMR (400 MHz,  $\text{CDCl}_3$ )

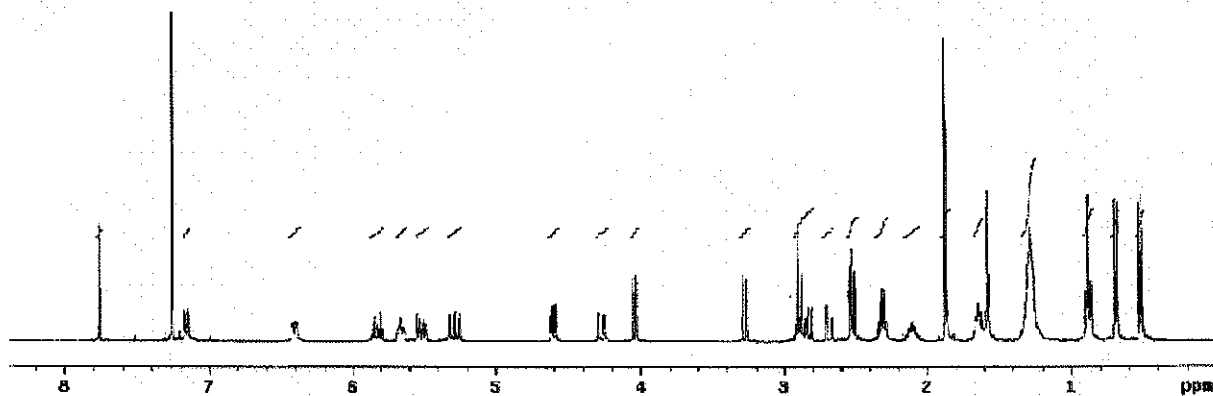

Natural Largazole, Leusch, et. al. (*J. Am. Chem. Soc.*, 2008, 130, 1806-1807)

$^1\text{H}$  NMR (600 MHz,  $\text{CDCl}_3$ )

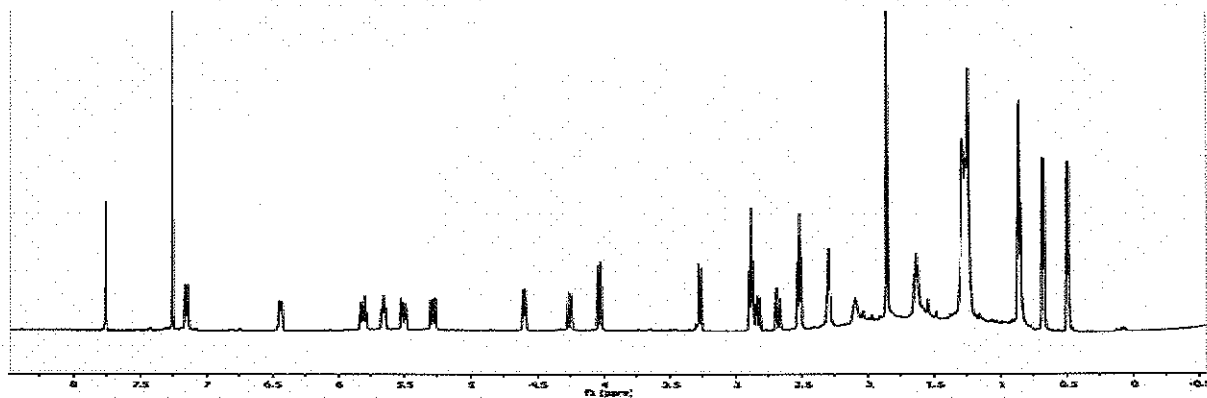

Synthetic Largazole, Ghosh, et.al

$^{13}\text{C}$  NMR (125 MHz,  $\text{CDCl}_3$ )

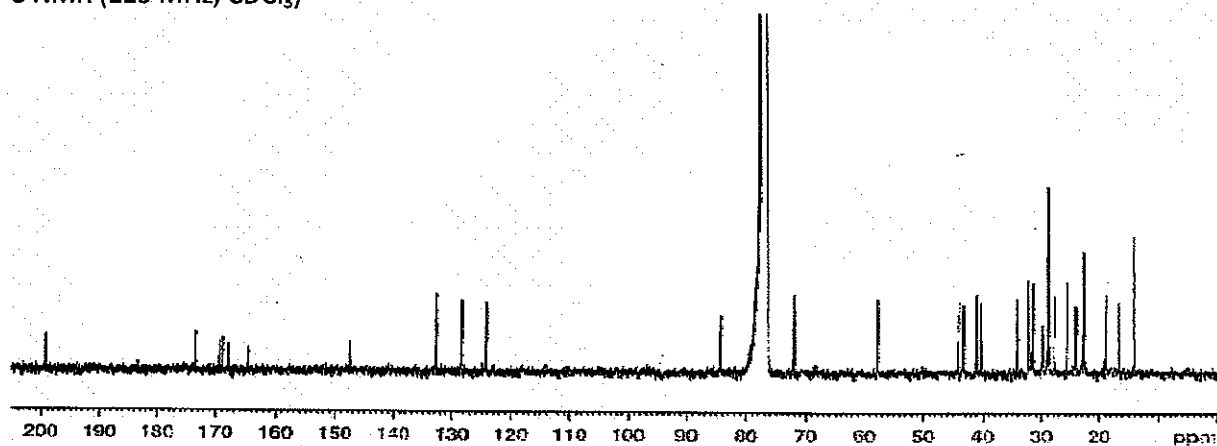

Synthetic Largazole, Leusch, Hong, et.al. (*J. Am. Chem. Soc.*, 2008, 130, 8455-8459)

$^{13}\text{C}$  NMR (100 MHz,  $\text{CDCl}_3$ )

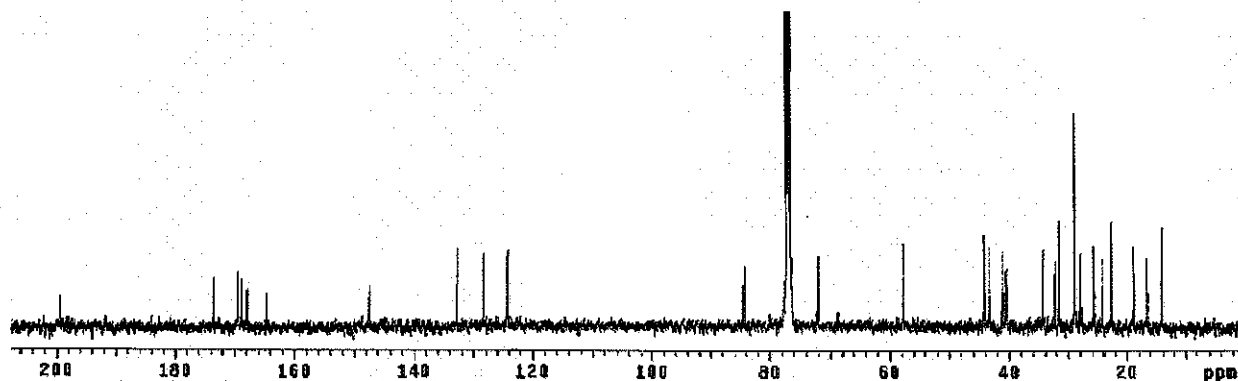

Natural Largazole, Leusch, et. al. (*J. Am. Chem. Soc.*, 2008, 130, 1806-1807)

$^{13}\text{C}$  NMR (150 MHz,  $\text{CDCl}_3$ )

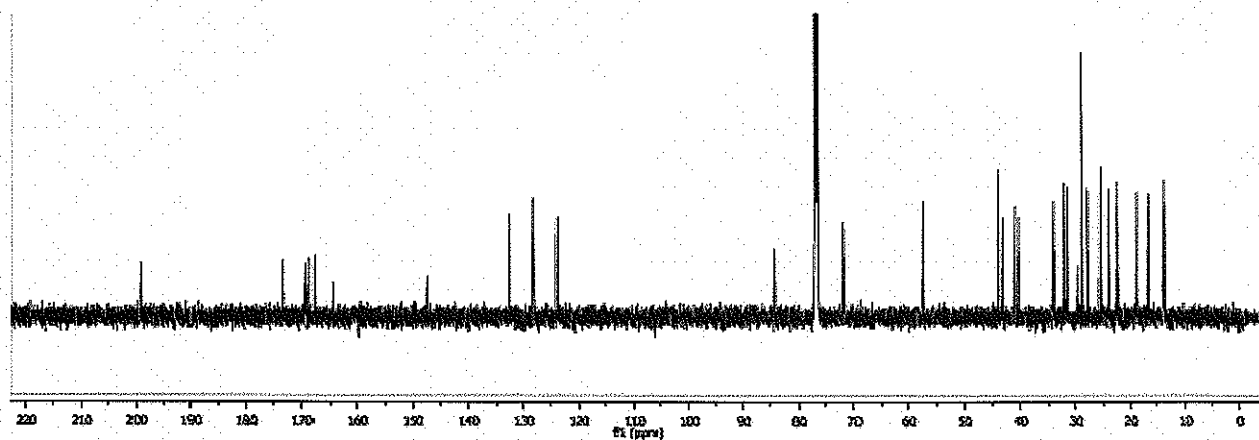

Supplement: NIHMS234784-supplement-2_si_002.pdf [file NIHMS234784-supplement-2_si_002.pdf]
